# Supplementary material for: Characterization of the expression of LAT1 as a prognostic indicator and a therapeutic target in renal cell carcinoma
Source: Sci Rep. 2019 Nov 20;9:16776. doi: 10.1038/s41598-019-53397-7 (PMC6868143; doi:10.1038/s41598-019-53397-7)

## Supplementary information

Characterization of the expression of LAT1 as a prognostic indicator and a therapeutic target in renal cell carcinoma

Kosuke Higuchi <sup>1,2</sup>, Shinichi Sakamoto <sup>2</sup>, Keisuke Ando <sup>1,2</sup>, Maihulan Maimaiti <sup>2</sup>,  
Nobushige Takeshita <sup>1,2</sup>, Kentaro Okunushi <sup>1</sup>, Yoshie Reien <sup>1</sup>, Yusuke Imamura <sup>2</sup>,  
Tomokazu Sazuka <sup>2</sup>, Kazuyoshi Nakamura<sup>2</sup>, Jun Matsushima <sup>3</sup>, Tomomi Furihata <sup>4</sup>,  
Yuzuru Ikehara <sup>5</sup>, Tomohiko Ichikawa <sup>2</sup>, \*Naohiko Anzai <sup>1,6</sup>

<sup>1</sup> *Department of Pharmacology, Chiba University Graduate School of Medicine, Chiba, Japan*

<sup>2</sup> *Department of Urology, Chiba University Graduate School of Medicine, Chiba, Japan*

<sup>3</sup> *Department of Pathology, Dokkyo Medical University Saitama medical center, Saitama, Japan*

<sup>4</sup> *Department of Clinical Pharmacy and Experimental Therapeutics Tokyo University of*

*Pharmacy and Life Sciences, Tokyo, Japan*

<sup>5</sup> *Department of Molecular Tumor Pathology, Chiba University Graduate School of  
Medicine, Chiba, Japan*

<sup>6</sup> *Department of Pharmacology and Toxicology, Dokkyo Medical University School of  
Medicine, Tochigi, Japan*

Correspondence to: Naohiko Anzai, M. D., Ph. D, Department of Pharmacology, Chiba  
University Graduate School of Medicine, 1-8-1 Inohana, Chuo-ku, Chiba 260-8670,  
Japan. Tel/Fax: 043-226-2050/2052, e-mail: [anzai@chiba-u.jp](mailto:anzai@chiba-u.jp)

**Table S1. Clinical factors associated with LAT1 expression levels in patients with RCC.**

| <b>Clinical Factor</b>                  | <b>Low LAT1<br/>(n=34)</b> | <b>High LAT1<br/>(n=58)</b> | <b>P value</b> |
|-----------------------------------------|----------------------------|-----------------------------|----------------|
| Age (AV± SD)                            | 58.6 ± 11.5                | 62.5 ± 13.4                 | 0.133          |
| Sex (% male)                            | 80.7%                      | 77.1%                       | 0.562          |
| Disease stage (% of stage 3 or greater) | 12.2%                      | 20%                         | 0.172          |
| T stage (% of pT2 or greater)           | 7%                         | 22.8%                       | 0.037          |
| Vascular invasion                       | 5.40%                      | 25%                         | 0.009          |
| Grade (% of grade 2 or greater)         | 63%                        | 67%                         | 0.428          |

**Table S2. Patients' characteristics**

| Patients characteristics           |        | number      |
|------------------------------------|--------|-------------|
| Age (AV± SD)                       |        | 58.6 ± 11.5 |
| Sex                                | male   | 73          |
|                                    | female | 19          |
| Disease stage                      | 1      | 75          |
|                                    | 2      | 3           |
|                                    | 3      | 6           |
|                                    | 4      | 8           |
| T stage                            | 1      | 79          |
|                                    | 2      | 4           |
|                                    | 3      | 8           |
|                                    | 4      | 1           |
| Vascular invasion                  |        | 12          |
| Grade                              | 1      | 33          |
|                                    | 2      | 51          |
|                                    | 3      | 8           |
| Total nephrectomy                  |        | 58          |
| Partial nephrectomy                |        | 36          |
| LAT1 score                         | 0      | 2           |
|                                    | 1      | 2           |
|                                    | 2      | 8           |
|                                    | 3      | 34          |
|                                    | 4      | 12          |
|                                    | 6      | 28          |
|                                    | 9      | 6           |
| Follow-up duration (Month, AV± SD) |        | 77.4 ± 40.5 |

**Table S3. Primers**

| mRNA           |         | Primer (5' > 3')        |
|----------------|---------|-------------------------|
| LAT1           | forward | TGTACGTGCTGACCAACCTG    |
|                | reverse | ATGACGCCCAGGTGATAGTTC   |
| LAT2           | forward | CACGGTTGCTGGACAGATAG    |
|                | reverse | GGGAACAGCAGGTTGATCTT    |
| LAT3           | forward | ATGGACTGGCGGATCAAGG     |
|                | reverse | TCTTGCAGTAGCGTGGTCTGATG |
| LAT4           | forward | GGTGGACAAGTTTCTGCTGAGTG |
|                | reverse | CAGCTGTATGAGGATGCGGTGTA |
| $\beta$ -actin | forward | CCAACCGCGAGAAGATGA      |
|                | reverse | CCAGAGGCGTACAGGGATAG    |

**Table S4. Antibodies**

| Antibody                                                                         | Supplier                  | Dilution |
|----------------------------------------------------------------------------------|---------------------------|----------|
| Mouse anti-LAT1 antibody                                                         | Trans Genic Inc.          | 1:200    |
| Rabbit anti- $\beta$ -actin antibody                                             | Cell Signaling Technology | 1:1000   |
| Rabbit anti-mTOR antibody                                                        | Cell Signaling Technology | 1:1000   |
| Rabbit anti-p-mTOR antibody                                                      | Cell Signaling Technology | 1:1000   |
| Rabbit anti-4E-BP1 antibody                                                      | Cell Signaling Technology | 1:1000   |
| Rabbit anti-p-4E-BP-1 antibody                                                   | Cell Signaling Technology | 1:1000   |
| Rabbit anti-p70S6K antibody                                                      | Thermo Fisher Scientific  | 1:1000   |
| Rabbit anti-p-p70S6K antibody                                                    | Cell Signaling Technology | 1:1000   |
| ECL-anti-rabbit IgG, horseradish peroxidase<br>linked whole antibody from donkey | GE Healthcare UK Ltd      | 1:10000  |
| ECL-anti-mouse IgG, horseradish peroxidase<br>linked whole antibody from sheep   | GE Healthcare UK Ltd      | 1:20000  |

**Fig. S1. Representative staining pictures showing LAT1 expression in normal kidney**

**tissues**

LAT1 expression in normal kidney tissues was analyzed by immunohistochemistry

(A,  $\times 100$  B,  $\times 400$ ). Representative staining images are shown.

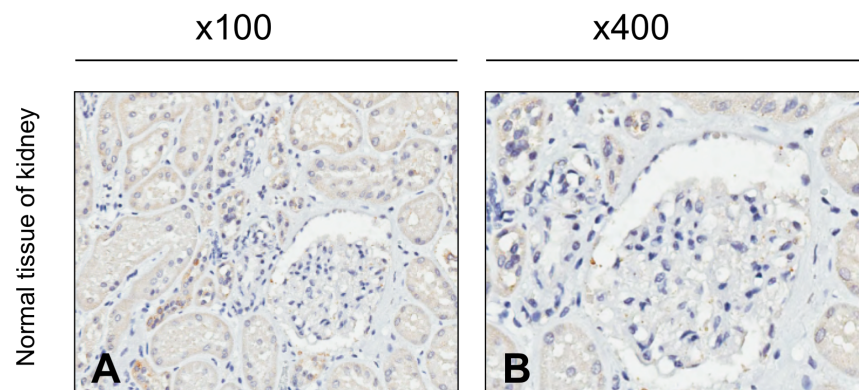

**Fig. S2. Postoperative survival of RCC patients categorized by various cutoffs of LAT1**

**expression**

Cause-specific postoperative overall survival curves for patients (A) with [S] 4-9 and

[S] 0-3, (B) with >30% of LAT1 expression area and 0-30% of LAT1 expression area are shown.

Analysis was performed the using Kaplan-Meier method with the log-rank test.

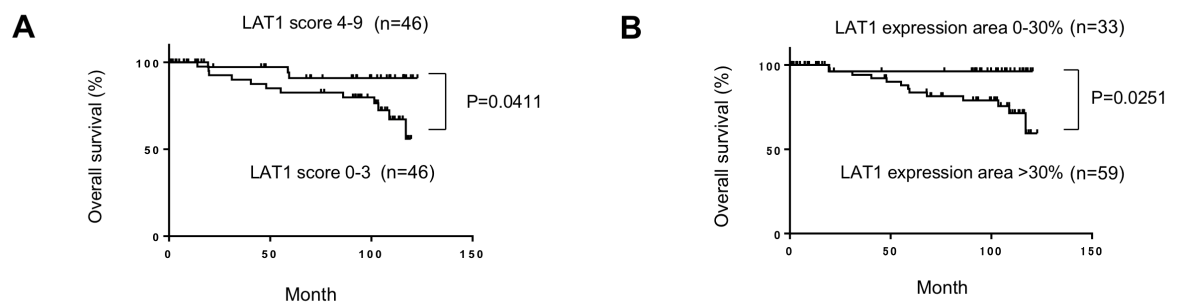

**Fig. S3. Effects of JPH203 on phosphorylation status of molecules belonging to the mTOR**

**signaling pathway in ACHN cells**

(A) ACHN cells were incubated with normal growth medium in the presence of JPH203 (10  $\mu$ M) for 24 h, 48 h, and 72 h, or DMSO (0.5%, a vehicle control) for 72 h. Whole cellular proteins were extracted and the phosphorylation status of mTOR, p70S6K, and 4E-BP1 was analyzed.  $\beta$ -actin was used as a loading control. Their total protein levels were also examined for references. Representative images from three independent experiments are shown. (B) The signal intensities were quantified using the Image J version 1.8.0.

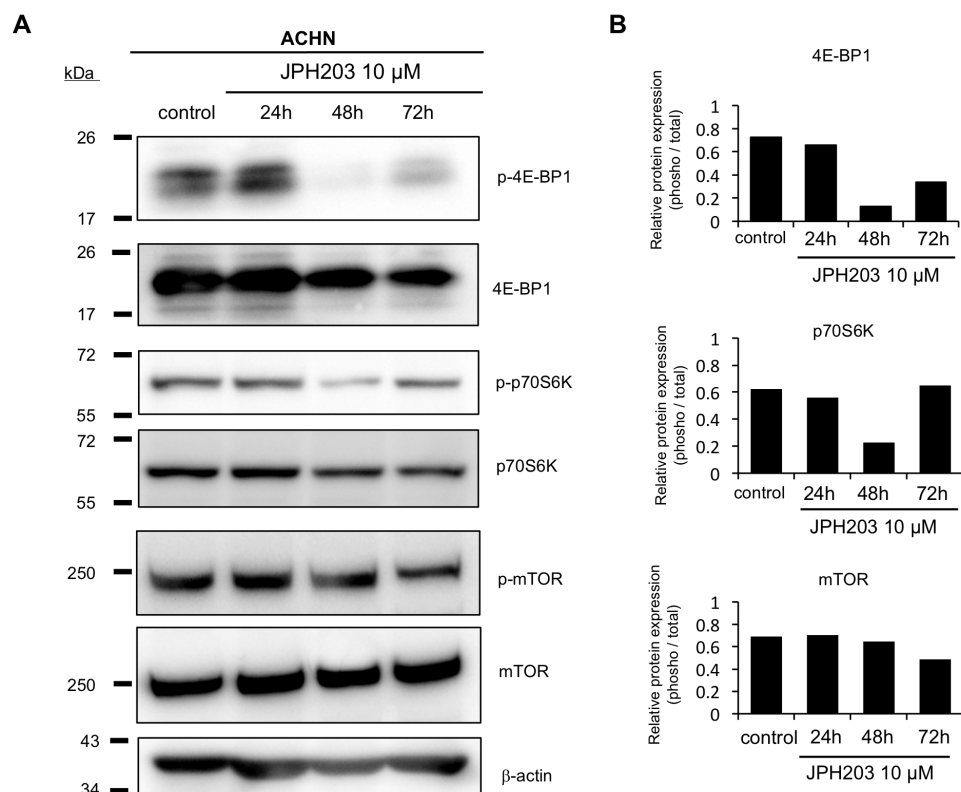

**Fig. S4. Effects of rapamycin treated with JPH203 on the viability of RCC cells**

Caki-1 and ACHN cells were treated with rapamycin (10 or 30 nM or absence) and JPH203 (10 or 30  $\mu$ M) or DMSO. The cell viabilities were determined by WST-8 assays, and viability bar graphs are presented as a percentage of the control value, which was obtained from cells treated with DMSO (0.5%). The experiments were repeated three times, each performed in triplicate. Each bar represents the mean with S.E.M. \*,  $P < 0.05$ ; n.s. not significant (unpaired Student's t-test).

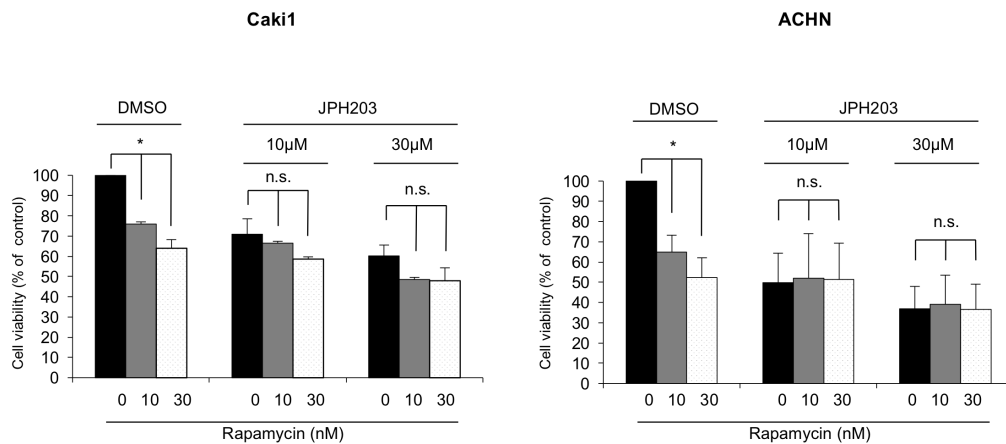

**Fig. S5. LAT1 and  $\beta$ -actin full-length western blot analysis**

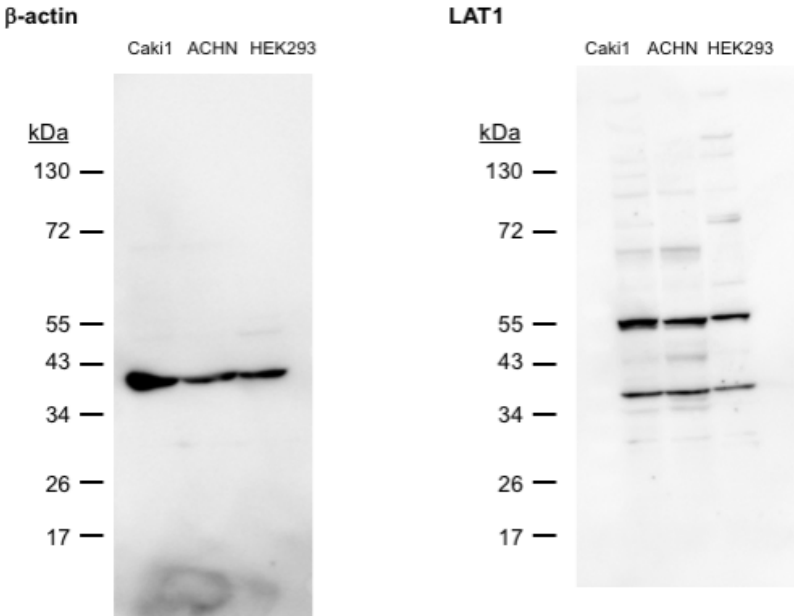

**Fig. S6. 4E-BP1 and phosphorylated 4E-BP1 full-length western blot analysis**

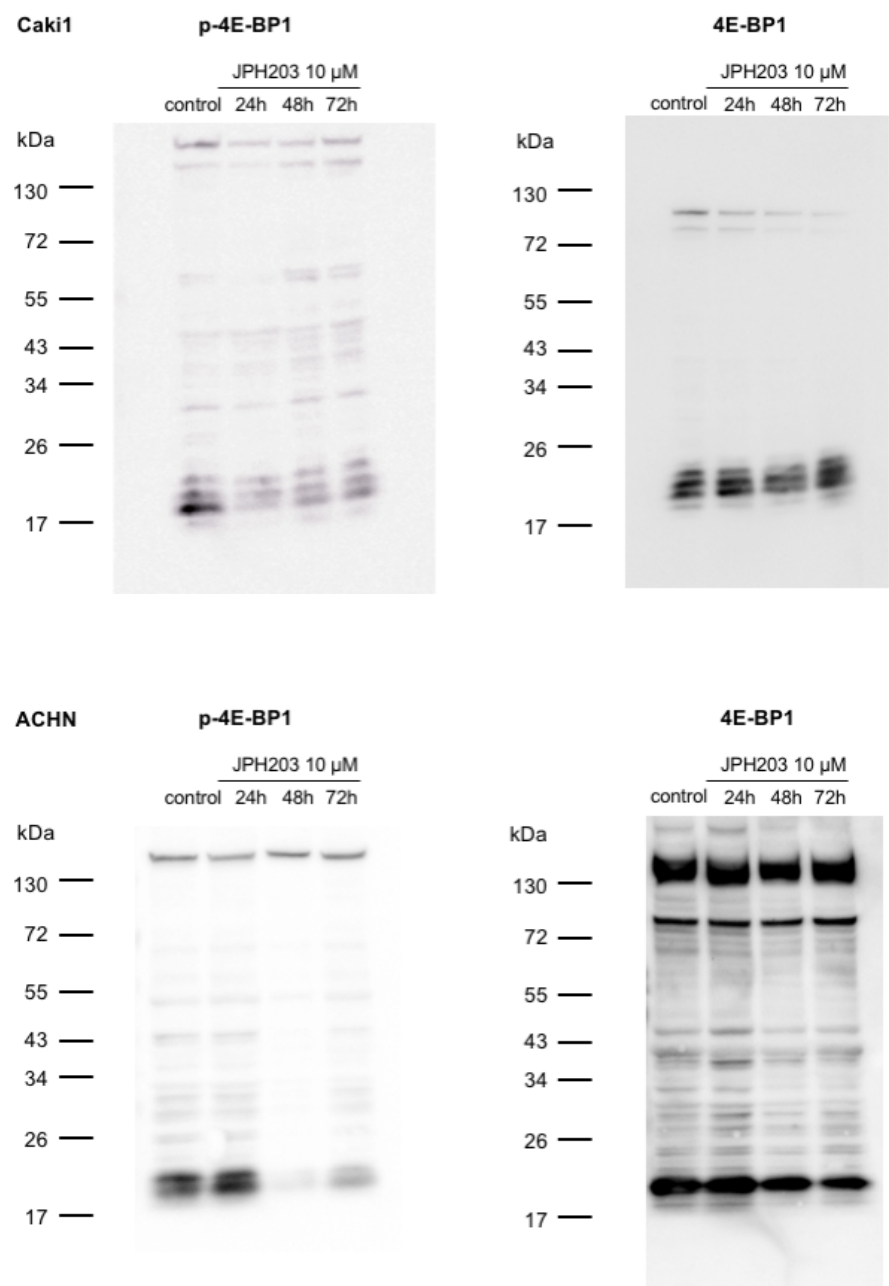

**Fig. S7. p70S6K and phosphorylated p70S6K full-length western blot analysis**

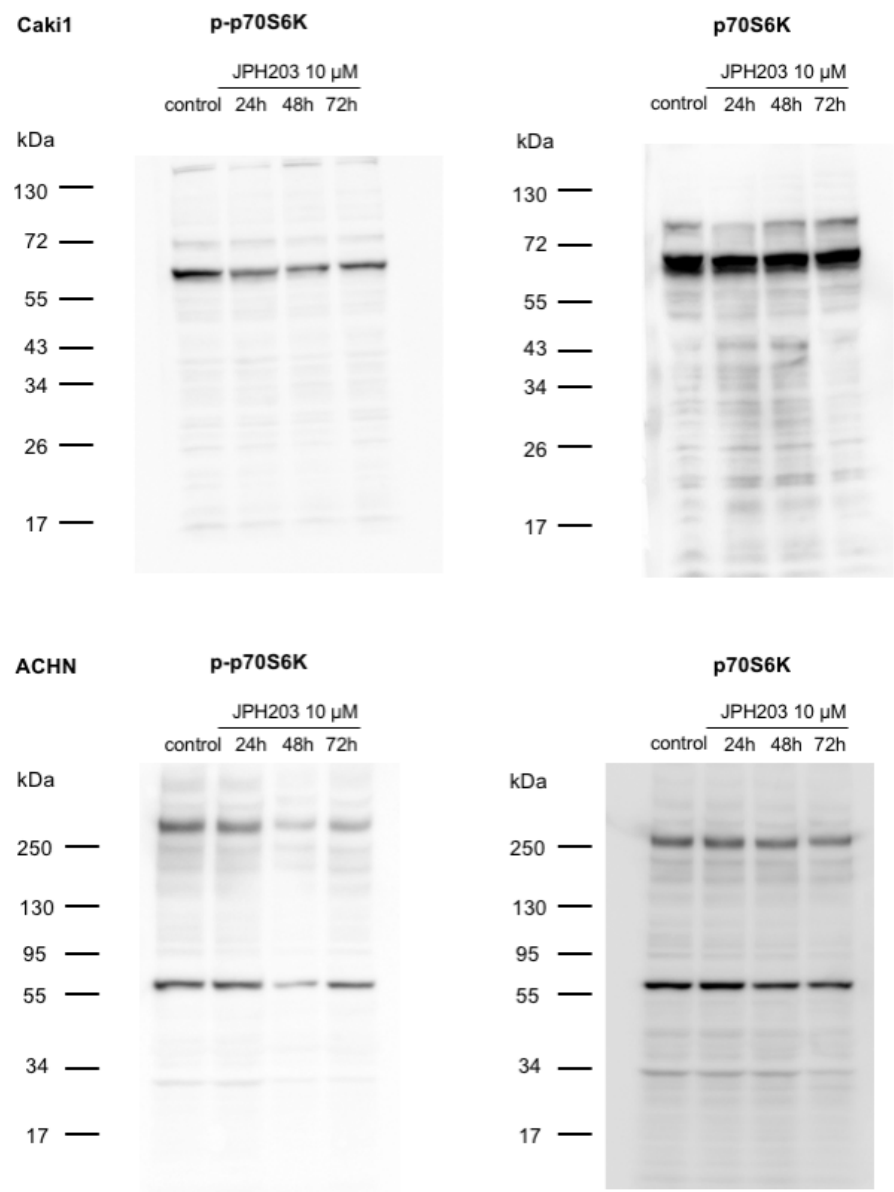

**Fig. S8. mTOR and phosphorylated mTOR full-length western blot analysis**

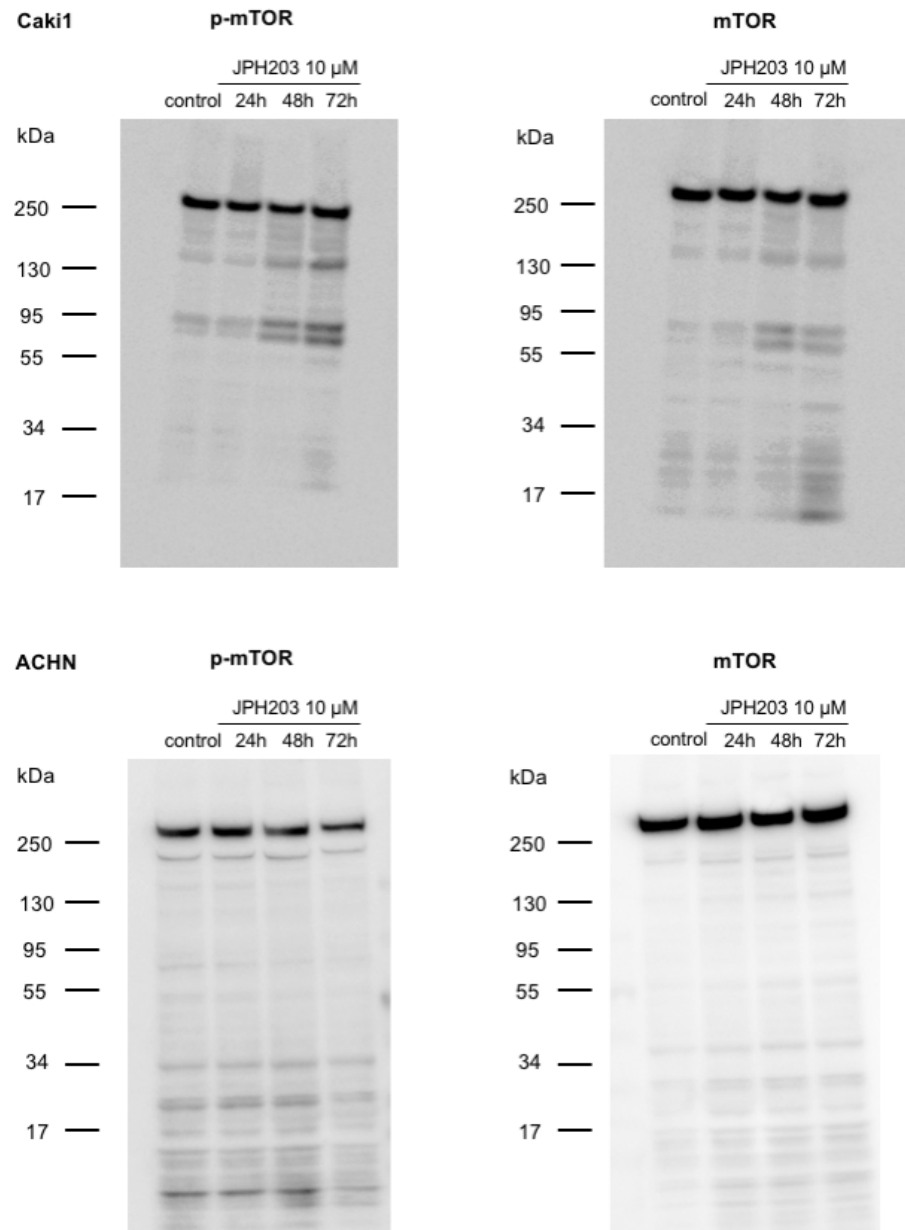

**Fig. S9.  $\beta$ -actin full-length western blot analysis**

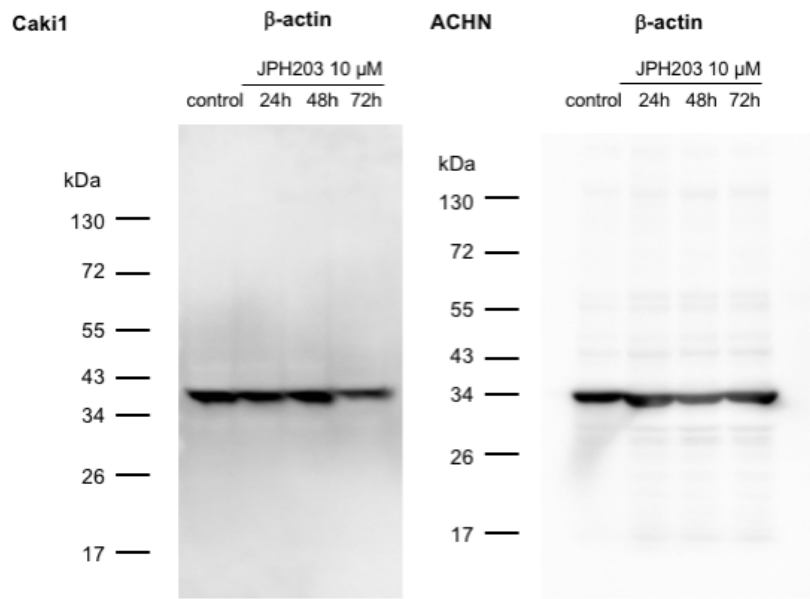

Supplement: Supplementary file 1 — Supplementary information [file 41598_2019_53397_MOESM1_ESM.pdf]
